# Supplementary material
Source: PubMed Central journal article supplement (PMC2755918)

## Supporting information

Pruitt, *et. al.*

### Figure Legends

#### References

Figure S1

Figure S2

Figure S3

Figure S4

#### Figure S1

The TcdA (*green*) and VcRTx (*blue*) CPDs are shown as overlaid ribbon diagrams with InsP6 shown as sticks. Lysine residues 577, 766, 777, and 794 from TcdA CPD are shown as *orange* sticks. Secondary structure elements that are present in the TcdA CPD but not the VcRTx CPD are labeled.

#### Figure S2

Comparison of the TcdA and VcRTx CPD structures and sequences. *A-B*, The structures of the TcdA (*A*) and VcRTx (*B*) CPDs are shown in the same orientation with the secondary structural elements annotated and color coded ( $\alpha$ -helices in *green*;  $\beta$ -strands in *blue*). We have labeled the secondary structural elements to maintain consistency with the VcRTx CPD and caspase-7 literature. *C*, The TcdA and VcRTx CPD sequences were aligned based on their structures (1) and displayed in ESPript (2). Strictly conserved residues are shown in *white* letters with a *red* background. Residues that are similar are boxed in *red* letters with *white* backgrounds. The secondary structural elements are marked above and below the sequences and the numbering corresponds to that of TcdA.

#### Figure S3

Effect of InsP6 on the structural stability to the TcdA CPD. TcdA CPD (at 1 mg/mL in 50 mM NaCl, 20 mM Tris, pH 8.0) was incubated with chymotrypsin for 1 hour at room temperature. The presence of 1 mM InsP6 provides significant protection from proteolysis. Similar results were obtained with trypsin (data not shown).

#### Figure S4

Conserved residues of the CPD. *A*, The TcdA CPD sequence (YP001087137) was aligned to sequences from four LCTs (TcdB (CAC19891), TcsL (CAA57959), TpeL (ACF49258),

TcnA (CAA88565)) and five diverse homologs found in gram-negative bacteria (VcRTx (ZP01975348), VsRTx (ZP00989505), Plu3217 (NP930444), PmHI4320 (YP002151764), AhRTx (YP855898)) using ClustalW (3). There are 14 strictly conserved residues shown in *white* letters with a *red* background.

#### References

1. Holm, L., and Park, J. (2000) *Bioinformatics* **16**, 566-567
2. Gouet, P., Courcelle, E., Stuart, D. I., and Metoz, F. (1999) *Bioinformatics* **15**, 305-308
3. Thompson, J. D., Higgins, D. G., and Gibson, T. J. (1994) *Nucleic Acids Res* **22**, 4673-4680

Supplemental Figure 1:

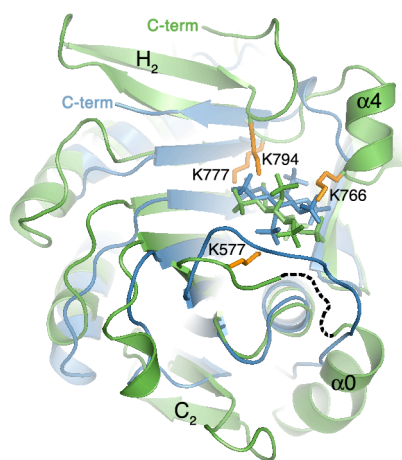



Supplemental Figure 3:

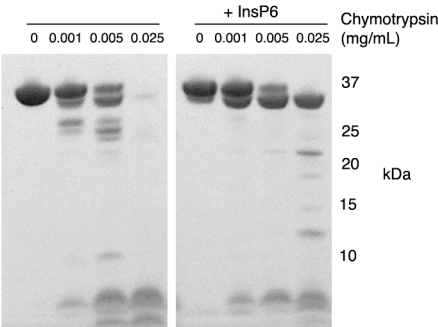

Supplemental Figure 4:

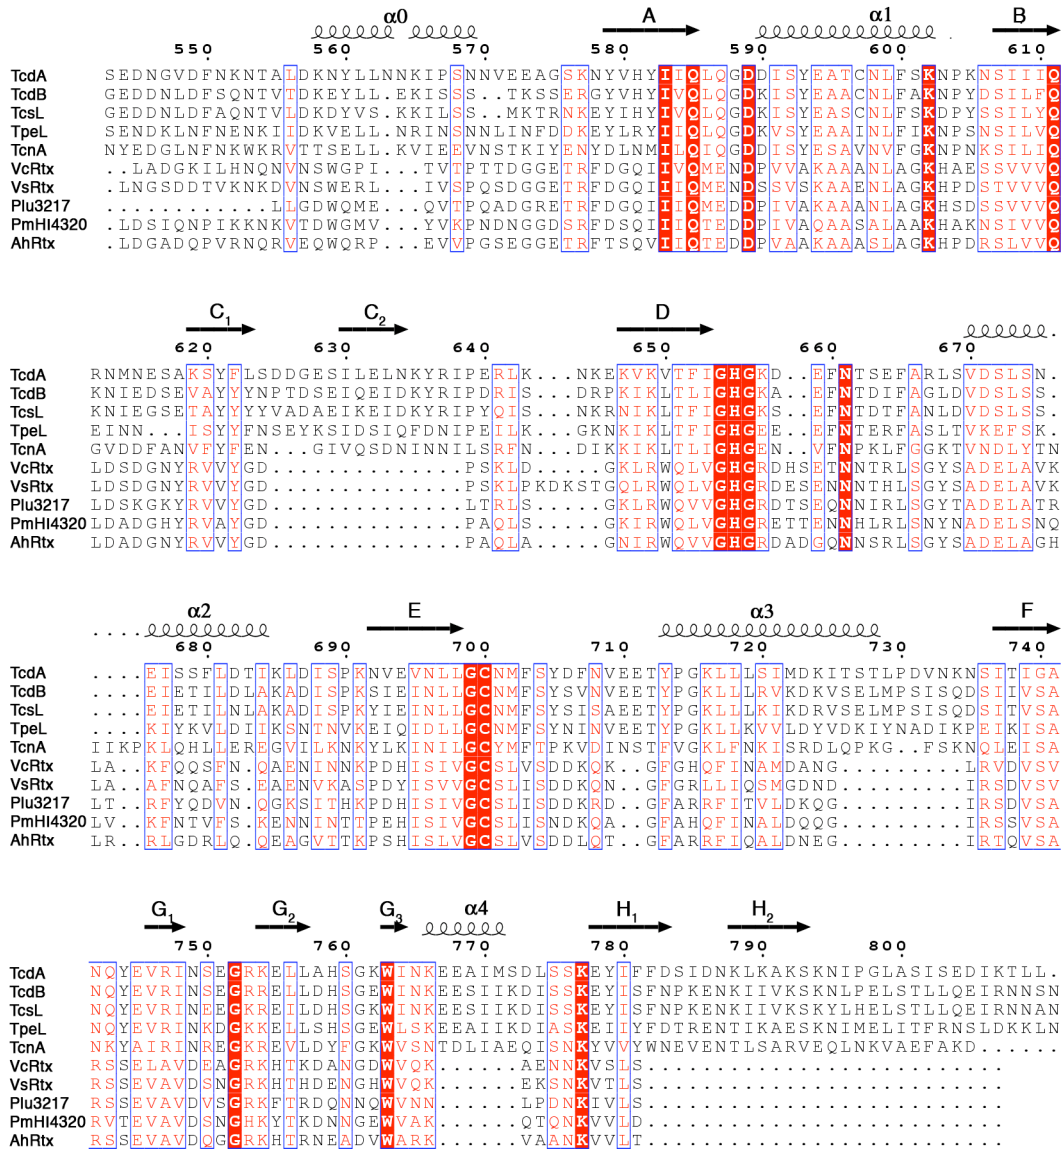

Supplement: supp_M109.018929_jbc.M109.018929-1.pdf [file supp_M109.018929_jbc.M109.018929-1.pdf]
